# Supplementary material for: Genomic deletions disrupt nitrogen metabolism pathways of a cyanobacterial diatom symbiont
Source: PubMed Central journal article supplement — Nat Commun. 2013 Apr 23;4:1767–. doi: 10.1038/ncomms2748 (PMC3667715; doi:10.1038/ncomms2748), 2013-04-23
Supplement: ncomms2748-s1.pdf [file ncomms2748-s1.pdf]

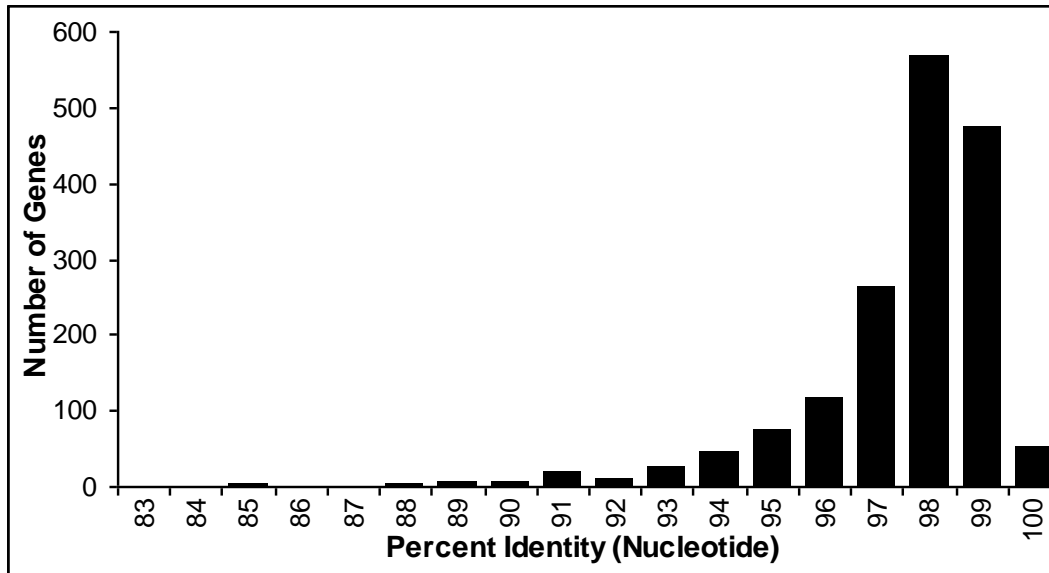

**Supplementary Figure S1. RintHH and RintHM gene similarity.** The percent identity at the nucleotide level of the 1,671 shared genes of *R. intracellularis* HM01 and HH01.

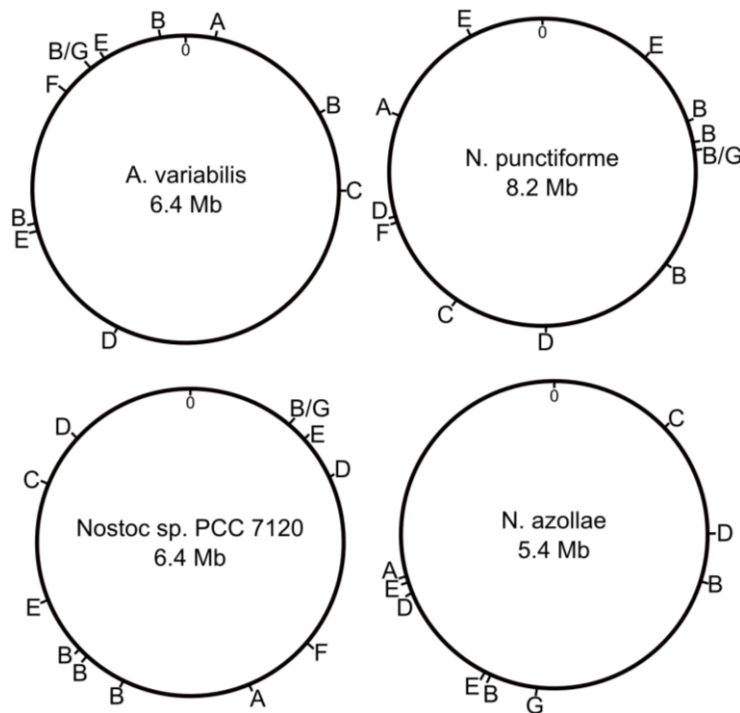

**Supplementary Figure S2. Nitrogen metabolism genes in Nostocales genomes.** The location of nitrogen metabolism-related genes across the four closed Nostocales genomes. A single letter may represent multiple genes (i.e. multiple adjacent nitrate transporters). A – GS inactivating factor 7, B – nitrate transporters, C – Fd-GOGAT, D – ammonium transporters, E – Urease subunits, F – Urea transporters, G – nitrate and nitrite reductase.

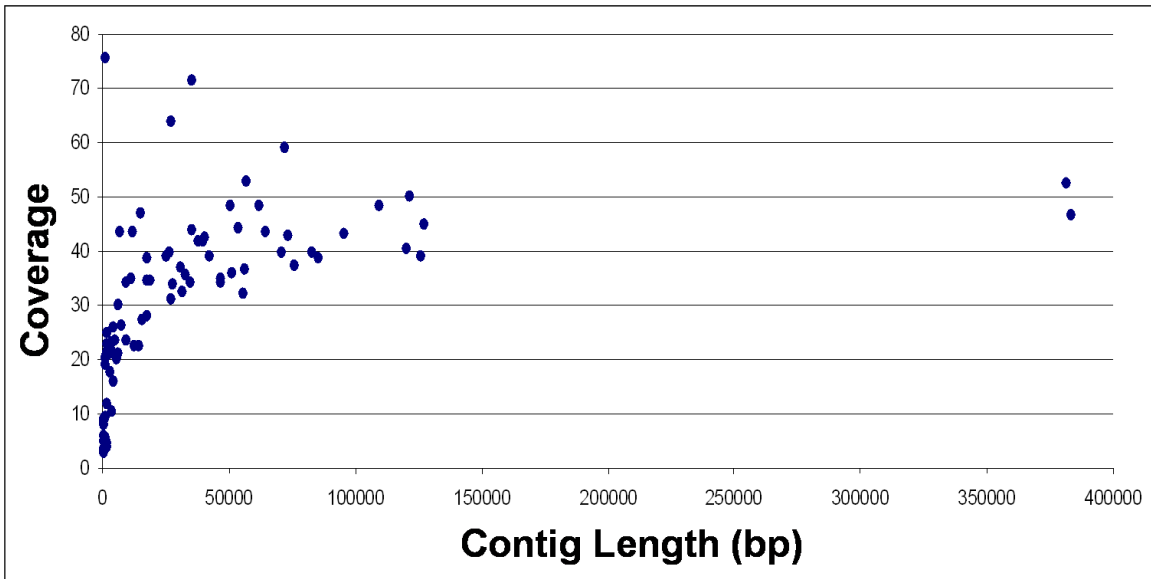

**Supplementary Figure S3. RintHH assembly.** The length and coverage depth of each of the 90 contigs that make up the *Richelia intracellularis* HH01 genome assembly.

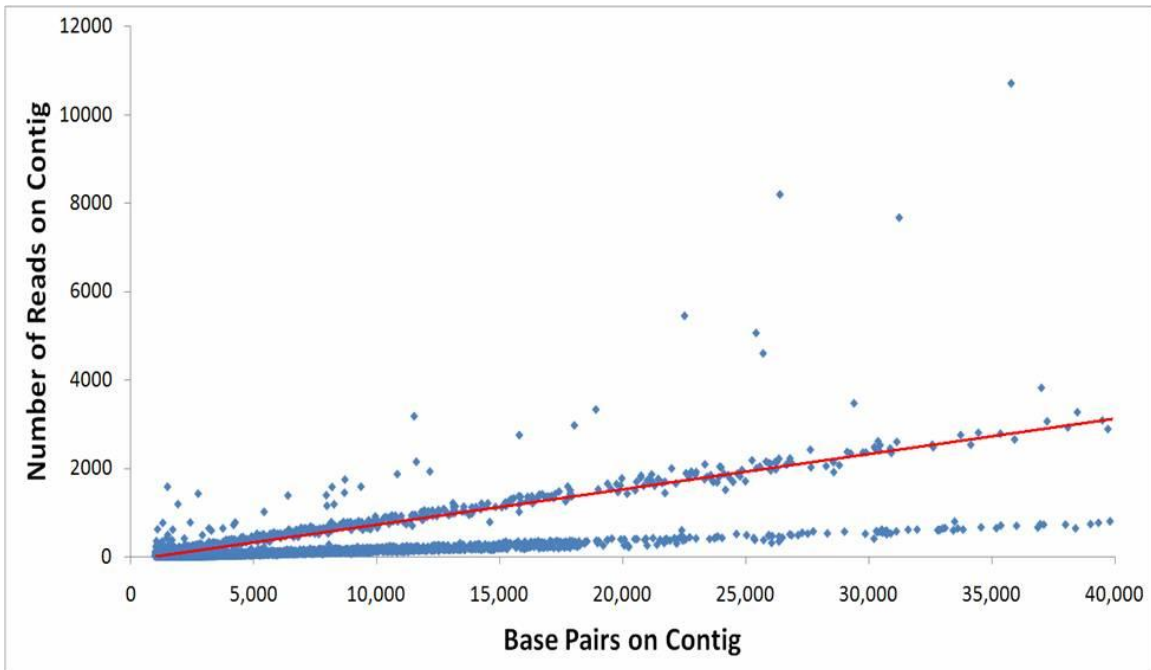

**Supplementary Figure S4. *Calothrix rhizosoleniae* SC01 assembly.** Data from the initial assembly of 454 reads from *C. rhizosoleniae* SC01 samples (69,919 contigs, 81.4 Mb). For each contig, the number of reads assembled to each contig plotted against the length of the contig. The contigs lying along the red line (representing 30x coverage depth) are the ones presumed to be from *C. rhizosoleniae* SC01, based on blast results.

**Genomic deletions disrupt nitrogen metabolism pathways of a cyanobacterial diatom symbiont** Hilton et al. **Supplementary Information**

**Supplementary Table S1. Obligate symbiont comparison.** Gene presence/absence in the *R. intracellularis* HH01 genome of genes uniquely present or uniquely absent in the *N. azollae* genome relative to other heterocyst-forming cyanobacterial genomes (Ran et al. 2010). *N. punctiforme* sequences are provided as representative functional gene sequences for genes not found in either obligate symbiont genome.

| Gene Product                                                 | Gene symbol | <i>N. azollae</i> | <i>R. intracellularis</i> | <i>N. punctiforme</i> |
|--------------------------------------------------------------|-------------|-------------------|---------------------------|-----------------------|
| uracil-DNA glycosylase                                       | <i>ung</i>  | Aazo_0465         | RintHH_15290              | np                    |
| dihydrofolate reductase                                      | <i>folA</i> | Aazo_1890         | np                        | np                    |
| thymidylate synthase                                         | <i>thyA</i> | Aazo_5011         | np                        | np                    |
| conserved hypothetical protein                               |             | *Aazo_3194        | RintHH_13480              | Npun_F1238            |
| putative GPH family sugar transporter                        |             | *Aazo_3944        | RintHH_3260               | Npun_F1762            |
| photosystem II reaction center L protein (psII 5 Kd protein) | <i>psbL</i> | *Aazo_1235        | RintHH_21410              | Npun_F5553            |
| lysyl-tRNA synthetase                                        | <i>lysS</i> | np                | RintHH_10460              | Npun_R5202            |
| thymidylate synthase (FAD)                                   | <i>thyX</i> | np                | RintHH_16770              | Npun_R2526            |
| conserved hypothetical protein                               |             | *Aazo_2347        | RintHH_8590               | Npun_F0905            |
| chromosomal replication initiator protein DnaA               | <i>dnaA</i> | *Aazo_2080        | *RintHH_4500              | Npun_F0001            |
| 6-phosphofructokinase                                        | <i>pfkA</i> | *Aazo_0224        | np                        | Npun_R0482            |
| putative L-cysteine/cystine lyase                            |             | *Aazo_2409        | np                        | Npun_F1365            |
| L-lactate dehydrogenase                                      | <i>ldh</i>  | np                | np                        | Npun_F2517            |
| dCTP deaminase                                               | <i>dcd</i>  | np                | np                        | Npun_F2524            |
| heterocyst-inhibiting signaling peptide                      | <i>patS</i> | np                | np                        | Npun_R5353            |

np – gene is not present

\* – gene present only as a pseudogene
